# Supplementary material for: Self-assembled Co0.85Se/carbon nanowires as a highly effective and stable electrocatalyst for the hydrogen evolution reaction
Source: Royal Society of Chemistry journal article supplement (doi:10.1039/c9ra02007a), 2019-01-01
Supplement: c9ra02007a1.pdf [file c9ra02007a1.pdf]

## **Self-assembled Co<sub>0.85</sub>Se/carbon nanowires as highly effective and stable electrocatalyst for hydrogen evolution reaction**

Baochen Sun, Xinqiang Wang\*, Dongxu Yang\*, Yuanfu Chen\*

School of Electronic Science and Engineering, and State Key Laboratory of Electronic Thin Films and Integrated Devices, University of Electronic Science and Technology of China, Chengdu 610054, PR China

\*Corresponding authors.

*E-mail addresses:* 843689677@qq.com (X. Q. Wang), Dongxu\_Y@hotmail.com

(D.X. Yang), yfchen@uestc.edu.cn (Y.F. Chen).

Mail Address: School of Electronic Science and Engineering, and State Key Laboratory of Electronic Thin Films and Integrated Devices, University of Electronic Science and Technology of China, Chengdu 610054, PR China

## List of Figures

|                                                                                 |   |
|---------------------------------------------------------------------------------|---|
| <b>Figure S1:</b> Schematic of experimental route                               | 3 |
| <b>Figure S2:</b> The annealing process and selenization process                | 3 |
| <b>Figure S3:</b> SEM images of Cobalt-NTA                                      | 3 |
| <b>Figure S4:</b> BET surface areas and pore size distribution                  | 4 |
| <b>Figure S5:</b> The morphology of after stability test                        | 4 |
| <b>Figure S6:</b> Time dependence of current density of partial enlarged detail | 5 |
| <b>Figure S7:</b> The equivalent circuit diagrams                               | 5 |
| <b>Table 1:</b> Comparison of catalytic parameters of different HER catalysts   | 6 |

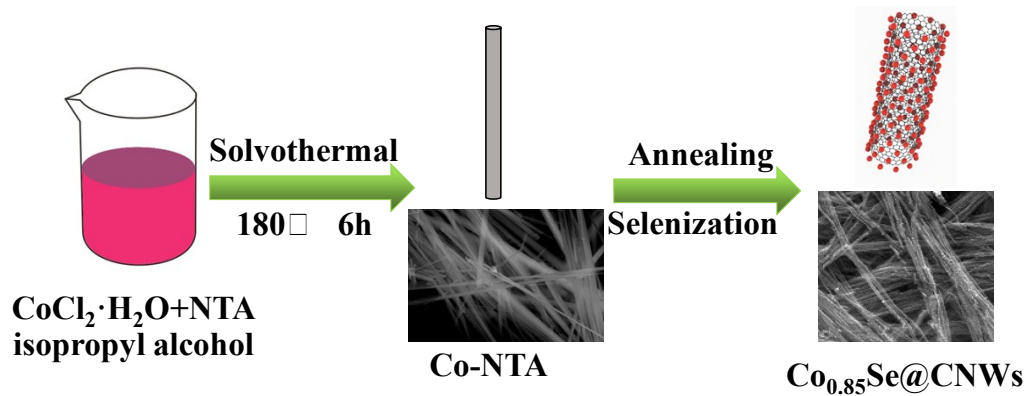

**Fig. S1:** Schematic of experimental route of  $\text{Co}_{0.85}\text{Se}@ \text{CNWs}$ .

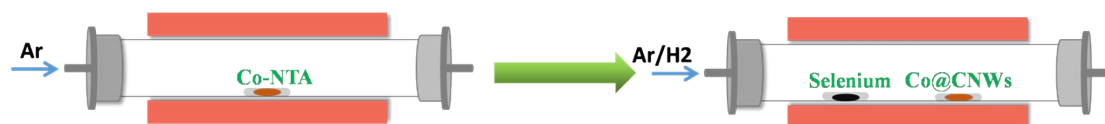

**Fig. S2:** The annealing process and selenization process for  $\text{Co}_{0.85}\text{Se}@ \text{CNWs}$ .

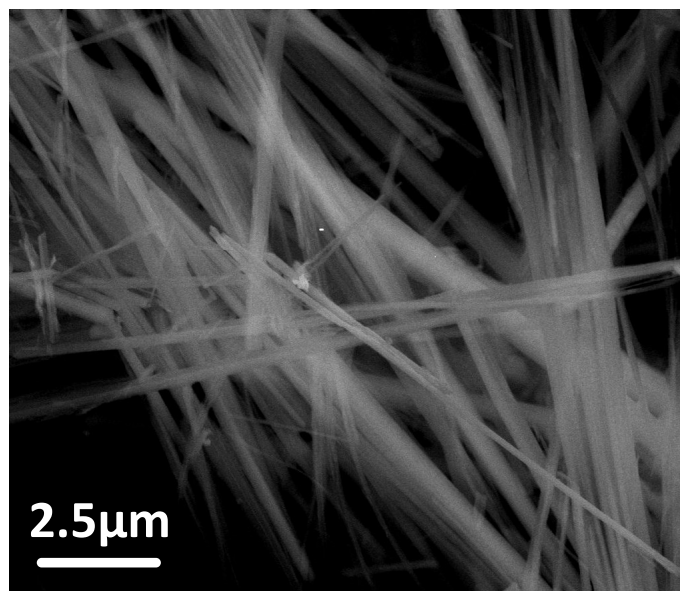

**Fig. S3:** SEM image of Cobalt-NTA.

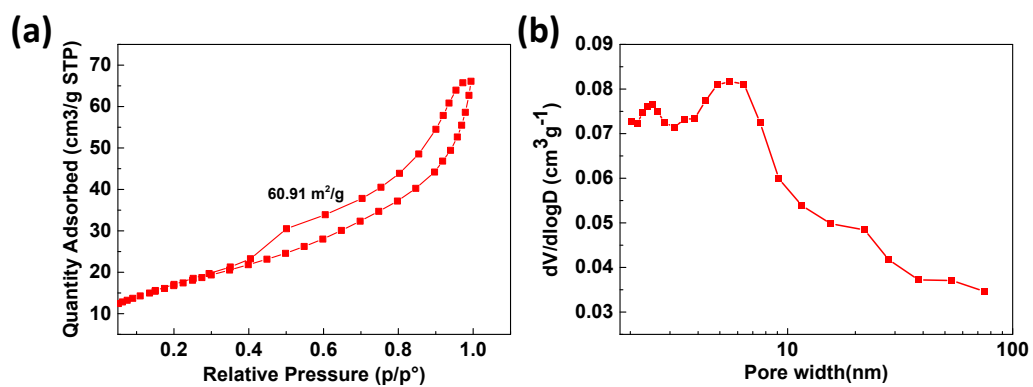

**Fig. S4:** (a) Nitrogen adsorption/desorption isotherm and (b) pore size distribution plot of Co<sub>0.85</sub>Se@CNWs.

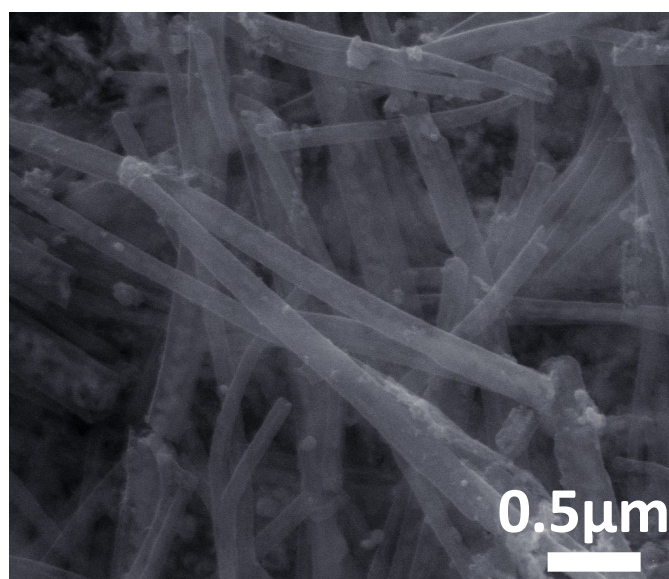

**Fig. S5:** The SEM image of Co<sub>0.85</sub>Se@CNWs after long-term HER stability test.

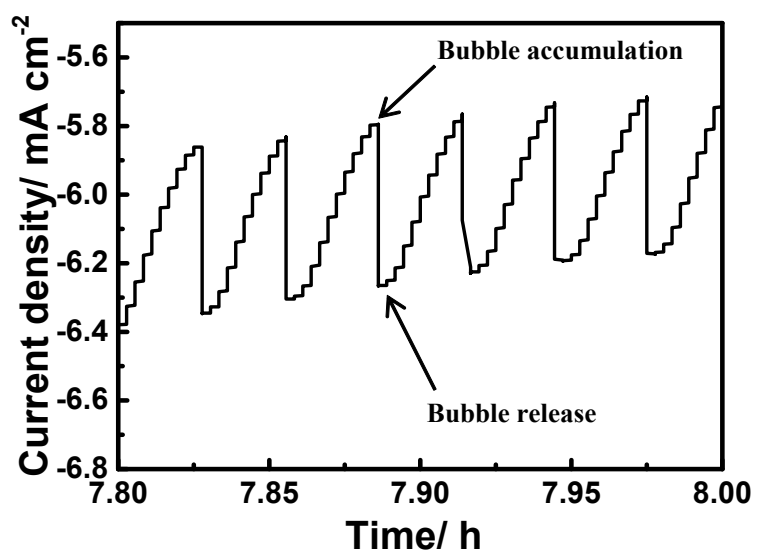

**Fig. S6:** Time dependence of current density of partial enlarged detail about  $\text{Co}_{0.85}\text{Se@CNWs}$ .

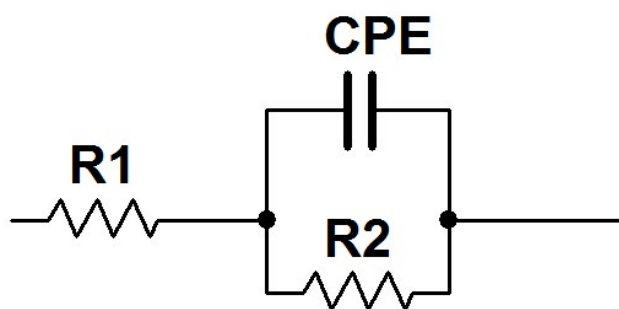

**Fig. S7:** The equivalent circuit diagrams.

Tab. S1 | Comparison of catalytic parameters of different HER catalysts

| <b>Samples</b>                      | <b>Overpotential<br/>(mV vs RHE)<br/>@10 mA/cm<sup>2</sup></b> | <b>Tafel slope<br/>(mVdec<sup>-1</sup>)</b> | <b>electrolyte</b>                   | <b>References</b> |
|-------------------------------------|----------------------------------------------------------------|---------------------------------------------|--------------------------------------|-------------------|
| Co <sub>0.85</sub> Se@CNWs          | 214                                                            | 43.4                                        | 0.5 M H <sub>2</sub> SO <sub>4</sub> | This work         |
| Ni <sub>0.85</sub> Se <sup>1</sup>  | 246                                                            | 49.3                                        | 0.5 M H <sub>2</sub> SO <sub>4</sub> | 1                 |
| CoSe <sub>2</sub> <sup>2</sup>      | 145                                                            | 65.9                                        | 0.5 M H <sub>2</sub> SO <sub>4</sub> | 2                 |
| CoSe <sub>2</sub> @DC <sup>3</sup>  | 150                                                            | 82                                          | 0.5 M H <sub>2</sub> SO <sub>4</sub> | 3                 |
| CoSe <sub>2</sub> <sup>3</sup>      | 270                                                            | 91.4                                        | 0.5 M H <sub>2</sub> SO <sub>4</sub> | 3                 |
| NiSe <sub>2</sub> <sup>4</sup>      | 190                                                            | 44                                          | 0.5 M H <sub>2</sub> SO <sub>4</sub> | 4                 |
| NiSe <sub>2</sub> /CNT <sup>5</sup> | 200                                                            | 29                                          | 0.5 M H <sub>2</sub> SO <sub>4</sub> | 5                 |
| Pt/C                                | -                                                              | 30                                          | 0.5 M H <sub>2</sub> SO <sub>4</sub> | This work         |
| Pt/C <sup>6</sup>                   | -                                                              | 31                                          | 0.5 M H <sub>2</sub> SO <sub>4</sub> | 6                 |
| Pt/C <sup>7</sup>                   | -                                                              | 30.6                                        | 0.5 M H <sub>2</sub> SO <sub>4</sub> | 7                 |

## References

- [1] B. Yu, Y. Hu, F. Qi, X. Wang, B. Zheng, K. Liu, W. Zhang, Y. Li, Y. Chen, *Electrochim Acta.*, **2017**, 242, 25-30.
- [2] H. Li, X. Qian, C. Zhu, X. Jiang, L. Shao, L. Hou, *J Mater Chem a*, **2017**, 5, 4513-4526.
- [3] W. Zhou, J. Lu, K. Zhou, L. Yang, Y. Ke, Z. Tang, S. Chen, *Nano Energy*, 2016, 28, 143-150.
- [4] I.H. Kwak, H.S. Im, D.M. Jang, Y.W. Kim, K. Park, Y.R. Lim, E.H. Cha, J. Park, *Acs Appl Mater Inter*, 2016, 8, 5327-5334.
- [5] B. Wang, X. Wang, B. Zheng, B. Yu, F. Qi, W. Zhang, Y. Li, Y. Chen, *Electrochem Commun*, 2017, 83, 51-55.
- [6] R. Zhou, J. Zhang, Z. Chen, X. Han, C. Zhong, W. Hu, Y. Deng, *Electrochimica Acta.*, 2017, 258, 866-875.
- [7] B. Yu, Y. Hu, F. Qi, X. Wang, B. Zheng, K. Liu, W. Zhang, Y. Li, Y. Chen, *Electrochimica Acta.*, 2017, 242, 25-30.
